# Supplementary material for: Superior oxygen evolution reaction performance of NiCoFe spinel oxide nanowires in situ grown on β-Ni(OH)2 nanosheet-decorated Ni foam: case studies on stoichiometric and off-stoichiometric oxides
Source: Royal Society of Chemistry journal article supplement (doi:10.1039/d2ta08994g), 2023-01-01
Supplement: d2ta08994g1.pdf [file d2ta08994g1.pdf]

## Supporting Information

### Superior oxygen evolution reaction performance of NiCoFe spinel oxide nanowires in-situ grown on $\beta$ -Ni(OH)<sub>2</sub> nanosheets-decorated Ni foam: case studies on stoichiometric and off-stoichiometric oxides

Prerna Upale,<sup>a</sup> Seema Verma\*<sup>a</sup> and Satishchandra B. Ogale <sup>a,b</sup>

Corresponding Author: [sa.verma@iiserpune.ac.in](mailto:sa.verma@iiserpune.ac.in)

<sup>a</sup>*Indian Institute of Science Education and Research (IISER), Pune 411008, Maharashtra, India.*

<sup>b</sup>*Research Institute for Sustainable Energy (RISE), TCG Centres for Research and Education in Science and Technology (TCG-CREST), Kolkata 700091, India.*

---

**This file includes following details:**

**Tables S1, S2, S3 and S4.**

**Figures S1, S2 and S3**

Table S1. Sample codes with the respective NiCoFe Sample

| S. No. | NiCoFe samples                                            | Sample codes                                | Hetero-structure sample codes (*)                                                                                       |
|--------|-----------------------------------------------------------|---------------------------------------------|-------------------------------------------------------------------------------------------------------------------------|
| 1.     | $\text{NiCo}_{2-x}\text{Fe}_x\text{O}_4$                  | N1C11; for x = 0.125<br>N1C12; for x = 0.25 | N1C11@NiO@NF<br>N1C12@NiO@NF                                                                                            |
| 2.     | $\text{Ni}_{0.75}\text{Co}_{2.25-x}\text{Fe}_x\text{O}_4$ | N2C21; for x = 0.125<br>N2C22; for x = 0.25 | N2C21@NiO@NF<br>N2C22@NiO@NF<br><br>(*) : NiO@NF is the $\beta\text{-Ni(OH)}_2$ decorated Nickel foam annealed at 350°C |

Table S2. Results of the fit of the Ni 2p X-ray Photoelectron Spectra for N1C12@NiO@NF and N2C22@NiO@NF electrocatalysts

| Sample       | Parameter               | Spin-Orbit Doublet I |                      | Spin-Orbit Doublet II |                      |
|--------------|-------------------------|----------------------|----------------------|-----------------------|----------------------|
|              |                         | Ni 2p <sub>3/2</sub> | Ni 2p <sub>1/2</sub> | Ni 2p <sub>3/2</sub>  | Ni 2p <sub>1/2</sub> |
| N1C12@NiO@NF | Eg (eV)                 | 854.3                | 871.9                | 855.8                 | 873.6                |
|              | fwhm (eV)               | 1.4                  | 2.0                  | 3.3                   | 3.0                  |
|              | area <sub>rel</sub> (%) | 18                   |                      | 82                    |                      |
|              | assignment              | Ni <sup>2+</sup>     |                      | Ni <sup>3+</sup>      |                      |
| N2C22@NiO@NF | Eg (eV)                 | 854.1                | 871.6                | 855.9                 | 873.3                |
|              | fwhm (eV)               | 1.4                  | 1.8                  | 3.1                   | 3.1                  |
|              | area <sub>rel</sub> (%) | 26                   |                      | 74                    |                      |
|              | assignment              | Ni <sup>2+</sup>     |                      | Ni <sup>3+</sup>      |                      |

Table S3. Results of the fit of the Co 2p X-ray Photoelectron Spectra for N1C12@NiO@NF and N2C22@NiO@NF electrocatalysts

| Sample       | Parameter               | Spin-Orbit Doublet I |                      | Spin-Orbit Doublet II |                      |
|--------------|-------------------------|----------------------|----------------------|-----------------------|----------------------|
|              |                         | Co 2p <sub>3/2</sub> | Co 2p <sub>1/2</sub> | Co 2p <sub>3/2</sub>  | Co 2p <sub>1/2</sub> |
| N1C12@NiO@NF | Eg (eV)                 | 779.5                | 794                  | 781                   | 796.4                |
|              | fwhm (eV)               | 1.9                  | 1.9                  | 3.4                   | 3.0                  |
|              | area <sub>rel</sub> (%) | 33                   |                      | 67                    |                      |
|              | assignment              | Co <sup>3+</sup>     |                      | Co <sup>2+</sup>      |                      |
| N2C22@NiO@NF | Eg (eV)                 | 779.7                | 794.9                | 781.4                 | 796.6                |
|              | fwhm (eV)               | 2.4                  | 1.9                  | 3.4                   | 2.8                  |
|              | area <sub>rel</sub> (%) | 51                   |                      | 49                    |                      |
|              | assignment              | Co <sup>3+</sup>     |                      | Co <sup>2+</sup>      |                      |

Table S4. Comparison of OER performance with previously reported NiCo-based electrocatalysts

| Electrocatalysts                                                     | Electrolyte | Overpotential, $\eta$ (mV)                                                                   | Tafel Slope (mV/dec) | Ref. |
|----------------------------------------------------------------------|-------------|----------------------------------------------------------------------------------------------|----------------------|------|
| NiCo oxides                                                          | 1 M KOH     | 340 at 10 mA/cm <sup>2</sup>                                                                 | 51                   | S1   |
| rNiCo <sub>2</sub> O <sub>4</sub> /Ni                                | 0.1 M KOH   | 379 at 10 mA/cm <sup>2</sup>                                                                 | 63.4                 | S2   |
| NiO/NiCo <sub>2</sub> O <sub>4</sub> @3DPNN                          | 1M KOH      | 264 at 10 mA/cm <sup>2</sup>                                                                 | 79                   | S3   |
| CoNi/CoFe <sub>2</sub> O <sub>4</sub> /NF                            | 1M KOH      | 290 at 100 mA/cm <sup>2</sup>                                                                | 45                   | S4   |
| NiCoFe@NiCoFeO<br>NTAs/CFC                                           | 1M KOH      | 201 at 10 mA/cm <sup>2</sup>                                                                 | 39                   | S5   |
| Ni-Fe LDHs                                                           | 1M KOH      | 297 at 100 mA/cm <sup>2</sup>                                                                | 60.8                 | S6   |
| NiCo <sub>2</sub> O <sub>4</sub> hollow<br>microcuboids              | 1 M NaOH    | 290 at 10 mA/cm <sup>2</sup>                                                                 | 53                   | S7   |
| Wire-like MoS <sub>2</sub> /rFe-<br>NiCo <sub>2</sub> O <sub>4</sub> | 1M NaOH     | 270 at 10 mA/cm <sup>2</sup><br>320 at 100 mA/cm <sup>2</sup>                                | 39                   | S8   |
| NiCo <sub>2-x</sub> Fe <sub>x</sub> O <sub>4</sub> NBs               | 1 M KOH     | 274 at 10 mA/cm <sup>2</sup><br>290 at 30 mA/cm <sup>2</sup>                                 | 42                   | S9   |
| Co <sub>3</sub> O <sub>4</sub> /Co-Fe oxide                          | 1 M KOH     | 297 at 10 mA/cm <sup>2</sup>                                                                 | 61                   | S10  |
| NiCoFe/NF/FeSO <sub>4</sub>                                          | 1 M KOH     | 293 at 100 mA/cm <sup>2</sup>                                                                | 48.3                 | S11  |
| B-NiCoFe (NiCoFe spinel<br>oxide grown on Fe<br>surface)             | 1 M KOH     | 342 at 10 mA/cm <sup>2</sup><br>500 at 110.5 mA/cm <sup>2</sup>                              | 48                   | S12  |
| Ni-Co <sub>3</sub> O <sub>4</sub> NS/NF                              | 1 M KOH     | 310 at 10 mA/cm <sup>2</sup><br>390 at 100 mA/cm <sup>2</sup>                                | 59.5                 | S13  |
| FeNi@FeNi                                                            | 1 M KOH     | 193 at 10 mA/cm <sup>2</sup><br>231 at 20 mA/cm <sup>2</sup><br>306 at 50 mA/cm <sup>2</sup> | 143.1                | S14  |

|                                                                              |           |                                                                                                |      |           |
|------------------------------------------------------------------------------|-----------|------------------------------------------------------------------------------------------------|------|-----------|
| Fe-NiCo-MOF/NF                                                               | 1 M KOH   | 290 at 50 mA/cm <sup>2</sup><br>326 at 100 mA/cm <sup>2</sup><br>373 at 200 mA/cm <sup>2</sup> | 96.9 | S15       |
| W <sub>0.5</sub> Co <sub>0.4</sub> Fe <sub>0.1</sub> /NF                     | 1 M KOH   | 250 at 10 mA/cm <sup>2</sup><br>310 at 100 mA/cm <sup>2</sup>                                  | 32   | S16       |
| Co <sub>3</sub> O <sub>4</sub> /NiCo <sub>2</sub> O <sub>4</sub> /Ni foam    | 0.1 M KOH | 320 at 10 mA/cm <sup>2</sup>                                                                   | 84   | S17       |
| NiO/NiCo <sub>2</sub> O <sub>4</sub> nanofibres                              | 1 M KOH   | 357 at 10 mA/cm <sup>2</sup>                                                                   | 130  | S18       |
| NiCoFe-LDHs nanosheets                                                       | 1 M NaOH  | 288 at 10 mA/cm <sup>2</sup>                                                                   | 92   | S19       |
| NiCo <sub>1.75</sub> Fe <sub>0.25</sub> O <sub>4</sub> @NiO@NF               | 1 M KOH   | 272 at 100 mA/cm <sup>2</sup>                                                                  | 54   | This work |
| Ni <sub>0.75</sub> Co <sub>2</sub> Fe <sub>0.25</sub> O <sub>4</sub> @NiO@NF | 1M KOH    | 292 at 100 mA/cm <sup>2</sup>                                                                  | 66   | This work |

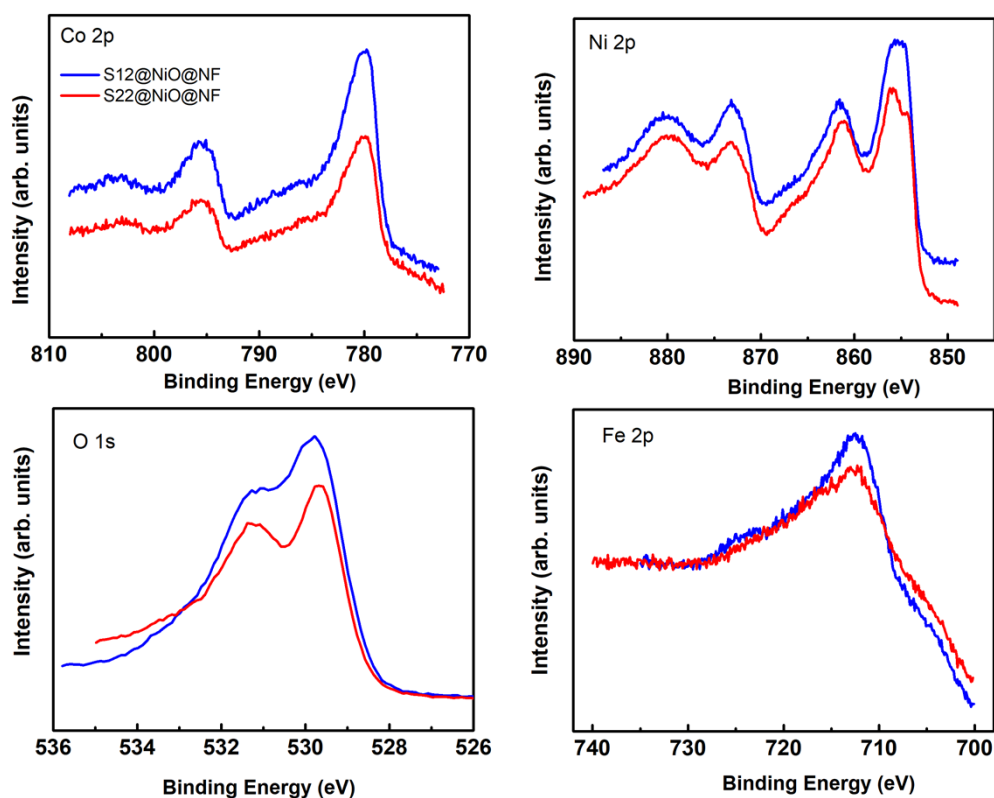

Figure S1. A comparison of the XPS peaks for N1C12@NiO@NF (blue plots) and N2C22@NiO@NF (red plots).

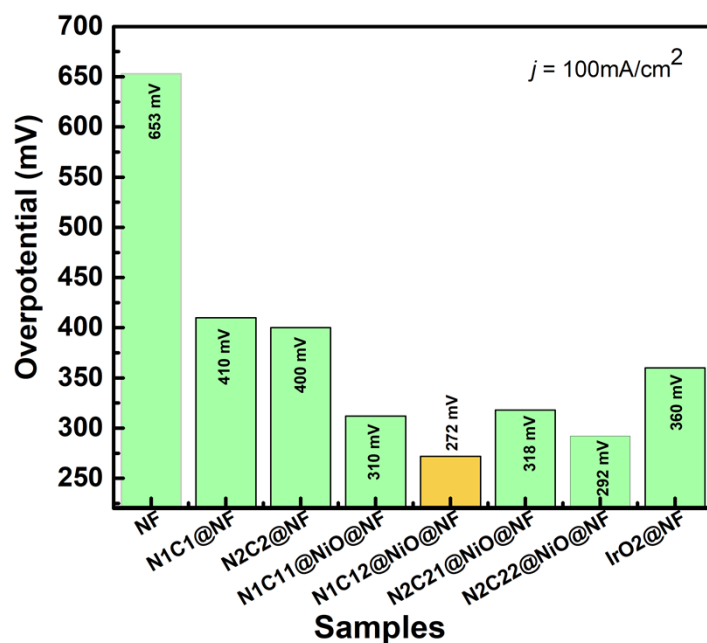

Figure S2: Comparison of overpotential values of different electrocatalysts at a current density of  $100 \text{ mA/cm}^2$ .

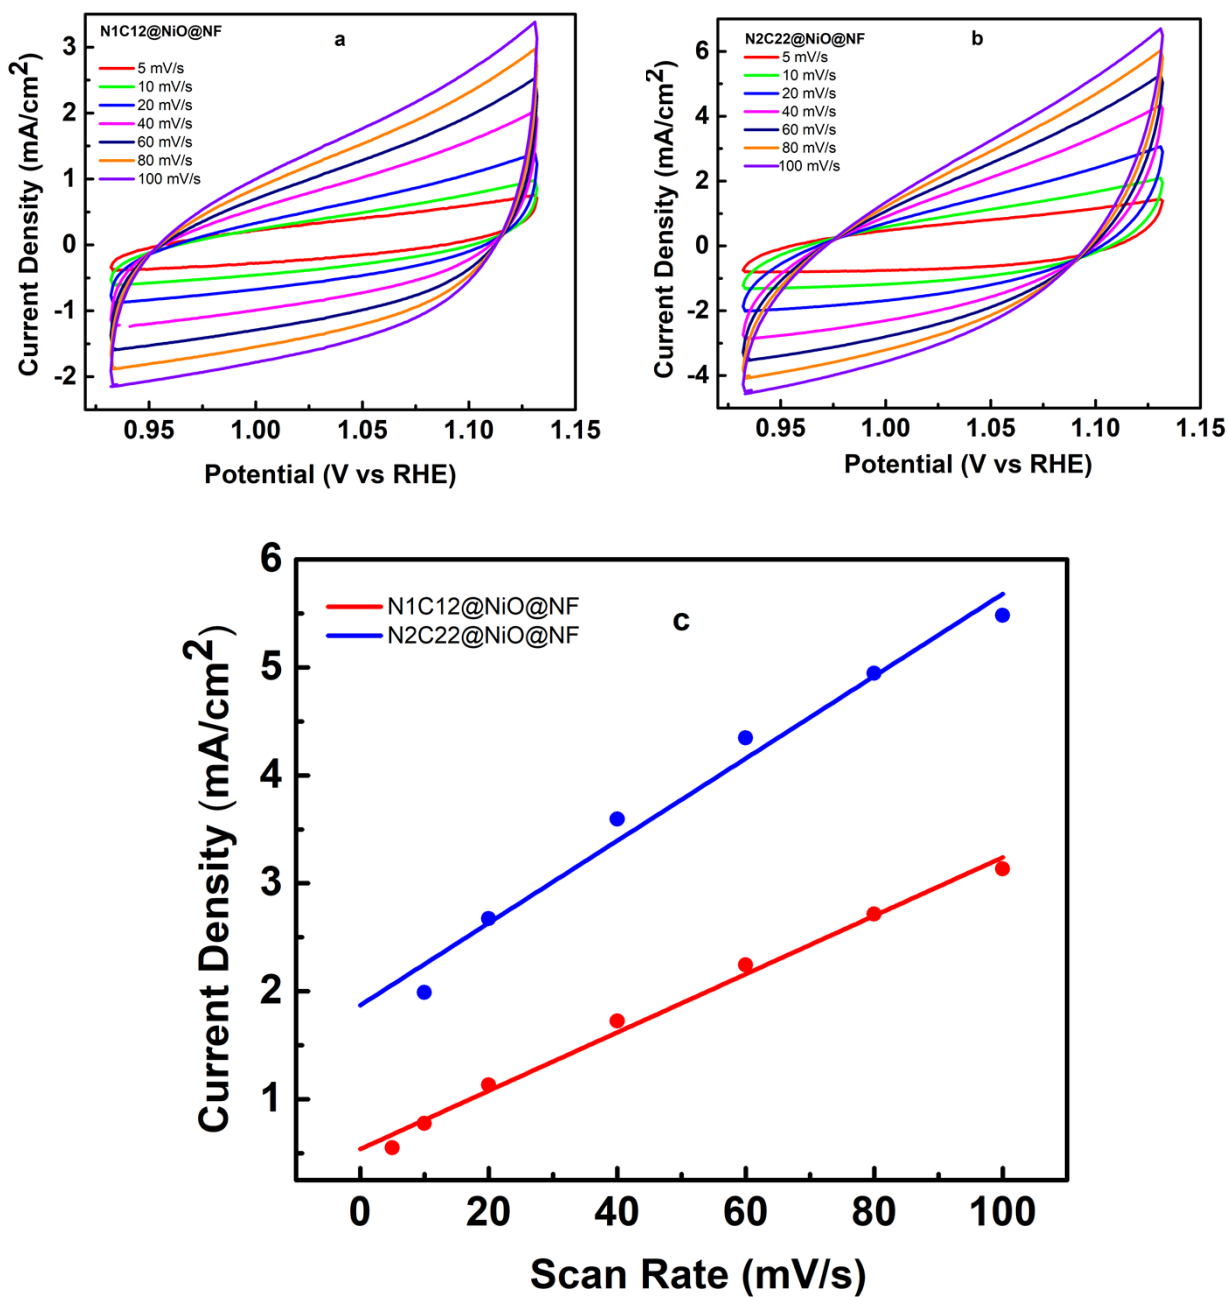

Figure S3: Cyclic Voltammetry (non-faradaic region, measured at the potential window from 0.932 to 1.132 V (vs RHE)) curves for N1C12@NiO@NF (a) and N2C22@NiO@NF (b) with different scan rates and the relationship between the current density at the potential of 1.035 V vs RHE and scanning rates (c).

## References

- S1. H-Y.Wang, Y-Y. Hsu, R. Chen, T-S. Chan, H. M. Chen, B. Liu, *Adv. Energy Mater.*, 2015, **5**, 1500091.
- S2. C. Zhu, S. Fu, D. Du, Y. Lin, *Chem. Eur. J.*, 2016, **22**, 4000 – 4007.
- S3. C. Chang, L. Zhang, C-W. Hsu, X-F. Chuah, S-Y. Lu, *ACS Appl. Mater. Interfaces*, 2018, **10**, 417–426.
- S4. S. Li, S. Sirisomboonchai, A. Yoshida, X. An, X. Hao, A. Abudula, G. Guan, *J. Mater. Chem. A*, 2018, **6**, 19221–19230.
- S5. Y. Liu, Y. Ying, L. Fei, Y. Liu, Q. Hu, G. Zhang, S. Y. Pang, W. Lu, C. L. Mak, X. Luo, L. Zhou, M. Wei, H. Huang, *J. Am. Chem. Soc.*, 2019, **141**, 8136–8145.
- S6. M. Salmanion, M. M. Najafpour, *Inorg. Chem.*, 2021, **60**, 6073–6085.
- S7. X. Gao, H. Zhang, Q. Li, X. Yu, Z. Hong, X. Zhang, C. Liang, Z. Lin, *Angew. Chem. Int. Ed.*, 2016, **55**, 6290 – 6294.
- S8. J. Li, D. Chu, H. Dong, R. D. Baker, R. Jiang, *J. Am. Chem. Soc.*, 2020, **142**, 50-54.
- S9. Yi. Huang, S. L. Zhnag, X. F. Lu, Z-P. Wu, D. Luan, X. W. (D.). Lou, *Angew. Chem. Int. Ed.*, 2021, **60**, 11841-11846.
- S10. X.Wang, Le. Yu, B. Y. Guan, S. Song, X. W. (D.). Lou, *Adv. Mater.*, 2018, **30**, 1801211.
- S11. H-S. Hu, Y. Li, G. Deng, Y-R. Shao, K-X. Li, C-B.Wang, Y.-Y. Feng, *Inorg. Chem. Front.*, 2021, **8**, 766–776.
- S12. J. Xie, S. Cao, L. Gao, F. Lei, P. Hao, B. Tang, *Chem. Commun.*, 2019, **55**, 9841-9844.
- S13. L. Zeng, K. Zhou, L. Yang, G. Du, L. Liu, W. Zhou, *ACS Appl. Energy Mater.*, 2018, **1**, 6279–6287.
- S14. K. Huang, R. Dong, C. Wang, W. Li, H. Sun, B. Geng, *ACS Sustainable Chem. Eng.*, 2019, **7**, 15073–15079.
- S15. T. Sun, S. Lin, Z. Xu, L. Li, *CrystEngComm*, 2021, **23**, 7650–7657.
- S16. Y. Pi, Q. Shao, P. Wang, F. Lv, S. Guo, J. Guo, *Angew. Chem. Int. Ed.*, 2017, **56**, 4502 – 4506.
- S17. M. Yang, W. Lu, R. Jin, X-C. Liu, S. Song, Y. Xing, *ACS Sustainable Chem. Eng.*, 2019, **7**, 12214–12221.
- S18. Z. Zhang, X. Liang, J. Li, J. Qian, Y. Liu, S. Yang, Y. Wang, D. Gao, D. Xue, *ACS Appl. Mater. Interfaces*, 2020, **12**, 21661–21669.
- S19. M. Zhang, Y. Liu, B. Liu, Z. Chen, H. Xu, K. Yan, *ACS Catal.*, 2020, **10**, 5179-5189.
